# Supplementary material
Source: HighWire-hosted journal article supplement (https://bmjopen.bmj.com/content/11/8/e046798)
Supplement: inline-supplementary-material-1 [file inline-supplementary-material-1.pdf]

**#1 dexmedetomidine [MeSH Terms]**

**#2 "cleft palate"[All Fields] OR "lip palate"[All Fields] OR "cleft palate and lip"[All Fields]**

**#3 infant or children or pediatric patient [All Fields]**

**#4 randomized controlled trial [All Fields]**

**#5 #1 and #2 and #3 and #4**
