# Supplementary material
Source: HighWire-hosted journal article supplement (https://bmjopen.bmj.com/content/11/8/e046798)
Supplement: inline-supplementary-material-2 [file inline-supplementary-material-2.pdf]

## Risk of bias

Mostafa2020<sup>12</sup> (ClinicalTrials.gov ID: NCT03412474).

| Bias                                                                      | Authors' judgement | Support for judgement                                                                                                                                                                                                                                                             |
|---------------------------------------------------------------------------|--------------------|-----------------------------------------------------------------------------------------------------------------------------------------------------------------------------------------------------------------------------------------------------------------------------------|
| Random sequence generation (selection bias)                               | Low risk           | A computer-generated program of random numbers                                                                                                                                                                                                                                    |
| Allocation concealment (selection bias)                                   | unclear            | Not mentioned                                                                                                                                                                                                                                                                     |
| Blinding of participants and personnel (performance bias)<br>All outcomes | Low risk           | Neither the doctors (investigators) nor the patients' guardians or even the children themselves were aware of the group allocation and the drug received. One anesthesiologist not involved in the block implementation or the data collection, prepared all the study solutions. |
| Blinding of outcome assessment (detection bias)<br>All outcomes           | Low risk           | While a third, blinded to the previous protocol, was responsible only for data collection.                                                                                                                                                                                        |
| Incomplete outcome data (attrition bias)<br>All outcomes                  | Low risk           | No loss to follow-up                                                                                                                                                                                                                                                              |
| Selective reporting (reporting bias)                                      | Low risk           | The authors provided results for all measurements for 80 patients                                                                                                                                                                                                                 |
| Other bias                                                                | Low risk           | Groups well balanced                                                                                                                                                                                                                                                              |

**El-Emam2019<sup>13</sup>** Clinical Trials.gov ([NCT03480607](https://clinicaltrials.gov/ct2/show/study/NCT03480607))

| Bias                                                                      | Authors' judgement | Support for judgement                                                                                                                                                                                             |
|---------------------------------------------------------------------------|--------------------|-------------------------------------------------------------------------------------------------------------------------------------------------------------------------------------------------------------------|
| Random sequence generation (selection bias)                               | Low risk           | computer-generated randomization numbers                                                                                                                                                                          |
| Allocation concealment (selection bias)                                   | Low risk           | a closed-seal envelope                                                                                                                                                                                            |
| Blinding of participants and personnel (performance bias)<br>All outcomes | High risk          | The principal investigator prepared the drug and performed the block                                                                                                                                              |
| Blinding of outcome assessment (detection bias)<br>All outcomes           | Low risk           | the person observing and recording the parameters was blinded to the study.                                                                                                                                       |
| Incomplete outcome data (attrition bias)<br>All outcomes                  | Low risk           | No loss to follow-up                                                                                                                                                                                              |
| Selective reporting (reporting bias)                                      | High risk          | The primary outcome was to compare both groups regarding time to first rescue analgesic, while the primary outcomes in the pre-registration site were postoperative FLACC scale and postoperative sedation score. |
| Other bias                                                                | Low risk           | Groups well balanced                                                                                                                                                                                              |

**Obayah2010<sup>14</sup>**

| Bias                                                                      | Authors' judgement | Support for judgement                                                                         |
|---------------------------------------------------------------------------|--------------------|-----------------------------------------------------------------------------------------------|
| Random sequence generation (selection bias)                               | Unclear risk       | "randomly allocated" , no details                                                             |
| Allocation concealment (selection bias)                                   | Low risk           | The randomization was achieved by the opening of a sealed envelope by the attending physician |
| Blinding of participants and personnel (performance bias)<br>All outcomes | High risk          | Not mentioned                                                                                 |
| Blinding of outcome assessment (detection bias)<br>All outcomes           | High risk          | Not mentioned.                                                                                |
| Incomplete outcome data (attrition bias)<br>All outcomes                  | Low risk           | No loss to follow-up                                                                          |
| Selective reporting (reporting bias)                                      | Low risk           | The authors provided results for all measurements for 30 patients                             |
| Other bias                                                                | Low risk           | Groups well balanced                                                                          |

**Peng2015<sup>15</sup>** Chinese Clinical Trial Register (ChiCTR-TRC-13003865).

| Bias                                                                      | Authors' judgement | Support for judgement                                                                                                                                                                                       |
|---------------------------------------------------------------------------|--------------------|-------------------------------------------------------------------------------------------------------------------------------------------------------------------------------------------------------------|
| Random sequence generation (selection bias)                               | Low risk           | Randomly divided with a computer-generated sequence of numbers                                                                                                                                              |
| Allocation concealment (selection bias)                                   | Low risk           | a sealed envelop                                                                                                                                                                                            |
| Blinding of participants and personnel (performance bias)<br>All outcomes | High risk          | Not mentioned                                                                                                                                                                                               |
| Blinding of outcome assessment (detection bias)<br>All outcomes           | High risk          | Not mentioned.                                                                                                                                                                                              |
| Incomplete outcome data (attrition bias)<br>All outcomes                  | High risk          | The actual sample was 40 while the planned sample in the pre-registration site was 60.                                                                                                                      |
| Selective reporting (reporting bias)                                      | High risk          | The primary outcome was to compare both groups regarding emergence agitation and time about recovery parameters while the primary outcomes in the pre-registration site were heart rate and blood pressure. |
| Other bias                                                                | Low risk           | Groups well balanced                                                                                                                                                                                        |

**Boku2015**<sup>16</sup> (UMIN 000009869) <http://upload.umin.ac.jp>.

| Bias                                                                      | Authors' judgement | Support for judgement                                                                          |
|---------------------------------------------------------------------------|--------------------|------------------------------------------------------------------------------------------------|
| Random sequence generation (selection bias)                               | Low risk           | A computer-generated random number table                                                       |
| Allocation concealment (selection bias)                                   | Unclear risk       | Not mentioned.                                                                                 |
| Blinding of participants and personnel (performance bias)<br>All outcomes | Low risk           | The patient' s parents and the attending anesthesiologist were blinded to the group allocation |
| Blinding of outcome assessment (detection bias)<br>All outcomes           | Low risk           | Data for each patient were obtained by the blinded anesthesiologist.                           |
| Incomplete outcome data (attrition bias)<br>All outcomes                  | Low risk           | No loss to follow-up                                                                           |
| Selective reporting (reporting bias)                                      | Unclear risk       | Do not get the protocol                                                                        |
| Other bias                                                                | Low risk           | Groups well balanced                                                                           |

**Surana2017<sup>17</sup>**

| Bias                                                                      | Authors' judgement | Support for judgement                                                                                         |
|---------------------------------------------------------------------------|--------------------|---------------------------------------------------------------------------------------------------------------|
| Random sequence generation (selection bias)                               | Low risk           | a computer-generated randomized chart                                                                         |
| Allocation concealment (selection bias)                                   | Low risk           | The random group assignments were enclosed in a sealed opaque envelope                                        |
| Blinding of participants and personnel (performance bias)<br>All outcomes | Low risk           | the surgeons, the patients, and the anesthesiologist in the post-anesthesia care unit (PACU) were all blinded |
| Blinding of outcome assessment (detection bias)<br>All outcomes           | Low risk           | Data was recorded by a blinded observer.                                                                      |
| Incomplete outcome data (attrition bias)<br>All outcomes                  | Low risk           | No loss to follow-up                                                                                          |
| Selective reporting (reporting bias)                                      | Low risk           | The authors provided results for all measurements for 60 patients                                             |
| Other bias                                                                | Low risk           | Groups well balanced                                                                                          |

**Luo2017<sup>18</sup>**

| Bias                                                                      | Authors' judgement | Support for judgement                                                                                                                                                                                                |
|---------------------------------------------------------------------------|--------------------|----------------------------------------------------------------------------------------------------------------------------------------------------------------------------------------------------------------------|
| Random sequence generation (selection bias)                               | Low risk           | a computer-generated table of random numbers                                                                                                                                                                         |
| Allocation concealment (selection bias)                                   | Unclear risk       | Not mentioned.                                                                                                                                                                                                       |
| Blinding of participants and personnel (performance bias)<br>All outcomes | Low risk           | All pharmacological agents used in the present study were prepared and administered by the anesthesiologists who were blinded to the details of the study.                                                           |
| Blinding of outcome assessment (detection bias)<br>All outcomes           | Low risk           | Pediatric Anesthesia Emergence Delirium and CHIPPS scores were documented by a well-trained PACU nurse who was blinded to the study.                                                                                 |
| Incomplete outcome data (attrition bias)<br>All outcomes                  | Low risk           | 4 patients from group DS and 3 patients from group SF were excluded from the analysis                                                                                                                                |
| Selective reporting (reporting bias)                                      | Low risk           | The authors provided results for all measurements for 93 patients                                                                                                                                                    |
| Other bias                                                                | High risk          | Groups well balanced. Not in intention-to-treat: Of the 100 patients admitted to the study, 7 were later excluded by the authors for the reasons listed in table II, leaving data from 93 patients for consideration |

**Mei2014<sup>19</sup>**

| Bias                                                                      | Authors' judgement | Support for judgement                                             |
|---------------------------------------------------------------------------|--------------------|-------------------------------------------------------------------|
| Random sequence generation (selection bias)                               | Low risk           | a table of random numbers, no detail                              |
| Allocation concealment (selection bias)                                   | Unclear risk       | Not mentioned.                                                    |
| Blinding of participants and personnel (performance bias)<br>All outcomes | High risk          | Not mentioned.                                                    |
| Blinding of outcome assessment (detection bias)<br>All outcomes           | High risk          | Not mentioned.                                                    |
| Incomplete outcome data (attrition bias)<br>All outcomes                  | Low risk           | No loss to follow-up.                                             |
| Selective reporting (reporting bias)                                      | Low risk           | The authors provided results for all measurements for 60 patients |
| Other bias                                                                | Low risk           | Groups well balanced.                                             |



**Xiao2012<sup>20</sup>**

| Bias                                                                      | Authors' judgement | Support for judgement                                             |
|---------------------------------------------------------------------------|--------------------|-------------------------------------------------------------------|
| Random sequence generation (selection bias)                               | High risk          | randomized according to the operation time sequence               |
| Allocation concealment (selection bias)                                   | Unclear risk       | Not mentioned.                                                    |
| Blinding of participants and personnel (performance bias)<br>All outcomes | High risk          | Not mentioned.                                                    |
| Blinding of outcome assessment (detection bias)<br>All outcomes           | High risk          | Not mentioned.                                                    |
| Incomplete outcome data (attrition bias)<br>All outcomes                  | Low risk           | No loss to follow-up.                                             |
| Selective reporting (reporting bias)                                      | Low risk           | The authors provided results for all measurements for 54 patients |
| Other bias                                                                | Low risk           | Groups well balanced.                                             |

**Xi2012<sup>21</sup>**

| Bias                                                                      | Authors' judgement | Support for judgement                                                        |
|---------------------------------------------------------------------------|--------------------|------------------------------------------------------------------------------|
| Random sequence generation (selection bias)                               | Unclear risk       | Random mentioned, no detail                                                  |
| Allocation concealment (selection bias)                                   | Unclear risk       | Not mentioned.                                                               |
| Blinding of participants and personnel (performance bias)<br>All outcomes | High risk          | Not mentioned.                                                               |
| Blinding of outcome assessment (detection bias)<br>All outcomes           | High risk          | Not mentioned.                                                               |
| Incomplete outcome data (attrition bias)<br>All outcomes                  | Low risk           | No loss to follow-up.                                                        |
| Selective reporting (reporting bias)                                      | High risk          | Lack of complications, such as postoperative hoarseness, nausea and vomiting |
| Other bias                                                                | Low risk           | Groups well balanced.                                                        |

**Yun2016<sup>22</sup>**

| Bias                                                                      | Authors' judgement | Support for judgement                                              |
|---------------------------------------------------------------------------|--------------------|--------------------------------------------------------------------|
| Random sequence generation (selection bias)                               | Low risk           | a table of random numbers, no detail                               |
| Allocation concealment (selection bias)                                   | Unclear risk       | Not mentioned.                                                     |
| Blinding of participants and personnel (performance bias)<br>All outcomes | Low risk           | A blinded anesthesia nurse prepared and administered drugs         |
| Blinding of outcome assessment (detection bias)<br>All outcomes           | High risk          | Not mentioned.                                                     |
| Incomplete outcome data (attrition bias)<br>All outcomes                  | Low risk           | No loss to follow-up.                                              |
| Selective reporting (reporting bias)                                      | Low risk           | The authors provided results for all measurements for 120 patients |
| Other bias                                                                | Low risk           | Groups well balanced.                                              |

**Ju2013<sup>23</sup>**

| Bias                                                                      | Authors' judgement | Support for judgement                                             |
|---------------------------------------------------------------------------|--------------------|-------------------------------------------------------------------|
| Random sequence generation (selection bias)                               | Unclear risk       | Mentioned random, no detail                                       |
| Allocation concealment (selection bias)                                   | Unclear risk       | Not mentioned.                                                    |
| Blinding of participants and personnel (performance bias)<br>All outcomes | High risk          | Not mentioned.                                                    |
| Blinding of outcome assessment (detection bias)<br>All outcomes           | High risk          | Not mentioned.                                                    |
| Incomplete outcome data (attrition bias)<br>All outcomes                  | Low risk           | No loss to follow-up.                                             |
| Selective reporting (reporting bias)                                      | Low risk           | The authors provided results for all measurements for 80 patients |
| Other bias                                                                | Low risk           | Groups well balanced.                                             |

**Jun2018<sup>24</sup>**

| Bias                                                                      | Authors' judgement | Support for judgement                                                                                                                  |
|---------------------------------------------------------------------------|--------------------|----------------------------------------------------------------------------------------------------------------------------------------|
| Random sequence generation (selection bias)                               | Low risk           | Compute randomized                                                                                                                     |
| Allocation concealment (selection bias)                                   | Unclear risk       | Not mentioned.                                                                                                                         |
| Blinding of participants and personnel (performance bias)<br>All outcomes | High risk          | Not mentioned.                                                                                                                         |
| Blinding of outcome assessment (detection bias)<br>All outcomes           | High risk          | Not mentioned.                                                                                                                         |
| Incomplete outcome data (attrition bias)<br>All outcomes                  | Low risk           | No loss to follow-up.                                                                                                                  |
| Selective reporting (reporting bias)                                      | High risk          | The secondary outcomes were to compare both groups regarding extubation time and incision bleeding which were not mentioned in method. |
| Other bias                                                                | Low risk           | Groups well balanced.                                                                                                                  |
